# Supplementary material
Source: PubMed Central journal article supplement (PMC9358719)
Supplement: NIHMS1598818-supplement-1.pdf [file NIHMS1598818-supplement-1.pdf]

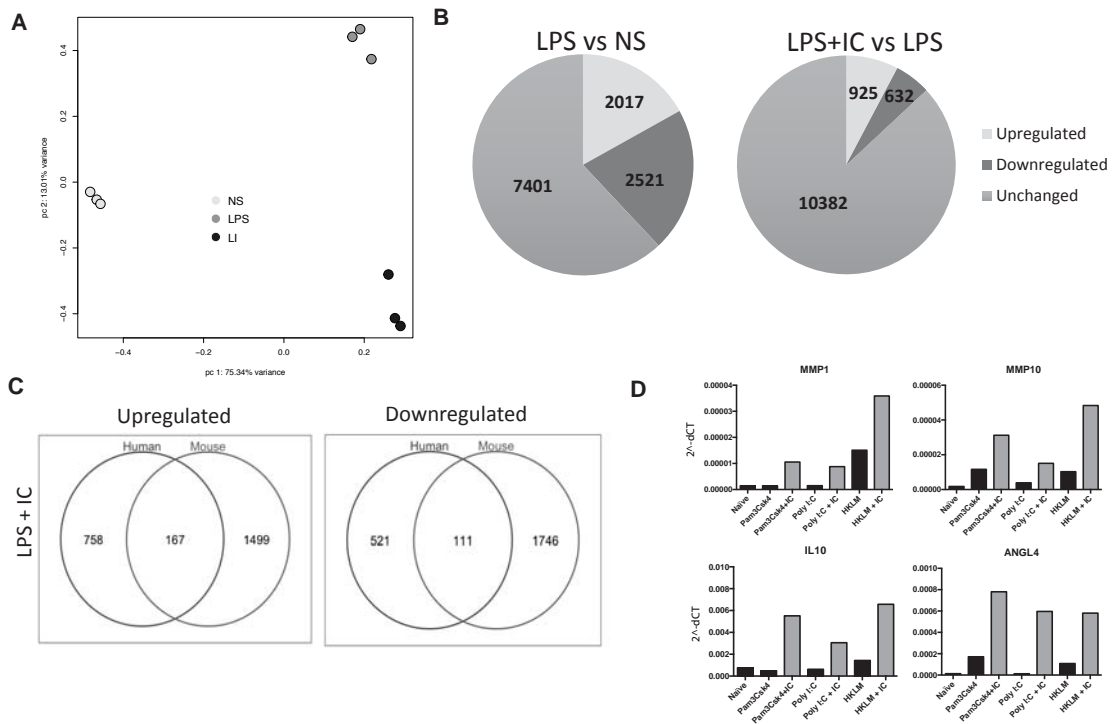

**Supplemental Figure 1. RNA-sequencing results for stimulated human macrophages.** Human monocyte-derived macrophages purchased from HemaCare were stimulated with LPS (LPS) or LPS with soluble immune complexes (LI) for 4 hours and total mRNA was isolated and sequenced on an Illumina platform. **(A)** Principal component analysis shows variance among samples and sample groups. **(B)** Pie charts illustrate differential expression in LPS-MΦ vs NS-MΦ and R-MΦ vs LPS-MΦ, as a percentage of total detectable genes in the transcriptome. **(C)** A comparison between orthologous human and mouse macrophage transcripts (BiomaRt), showing differential gene expression in response to stimulation with LPS+IC. **(D)** RT-PCR to measure transcript levels 4 hours after stimulation of human macrophages with TLR ligands in the presence or absence of particulate IC consisting of IgG-coated latex beads from (n=3) individual donors.

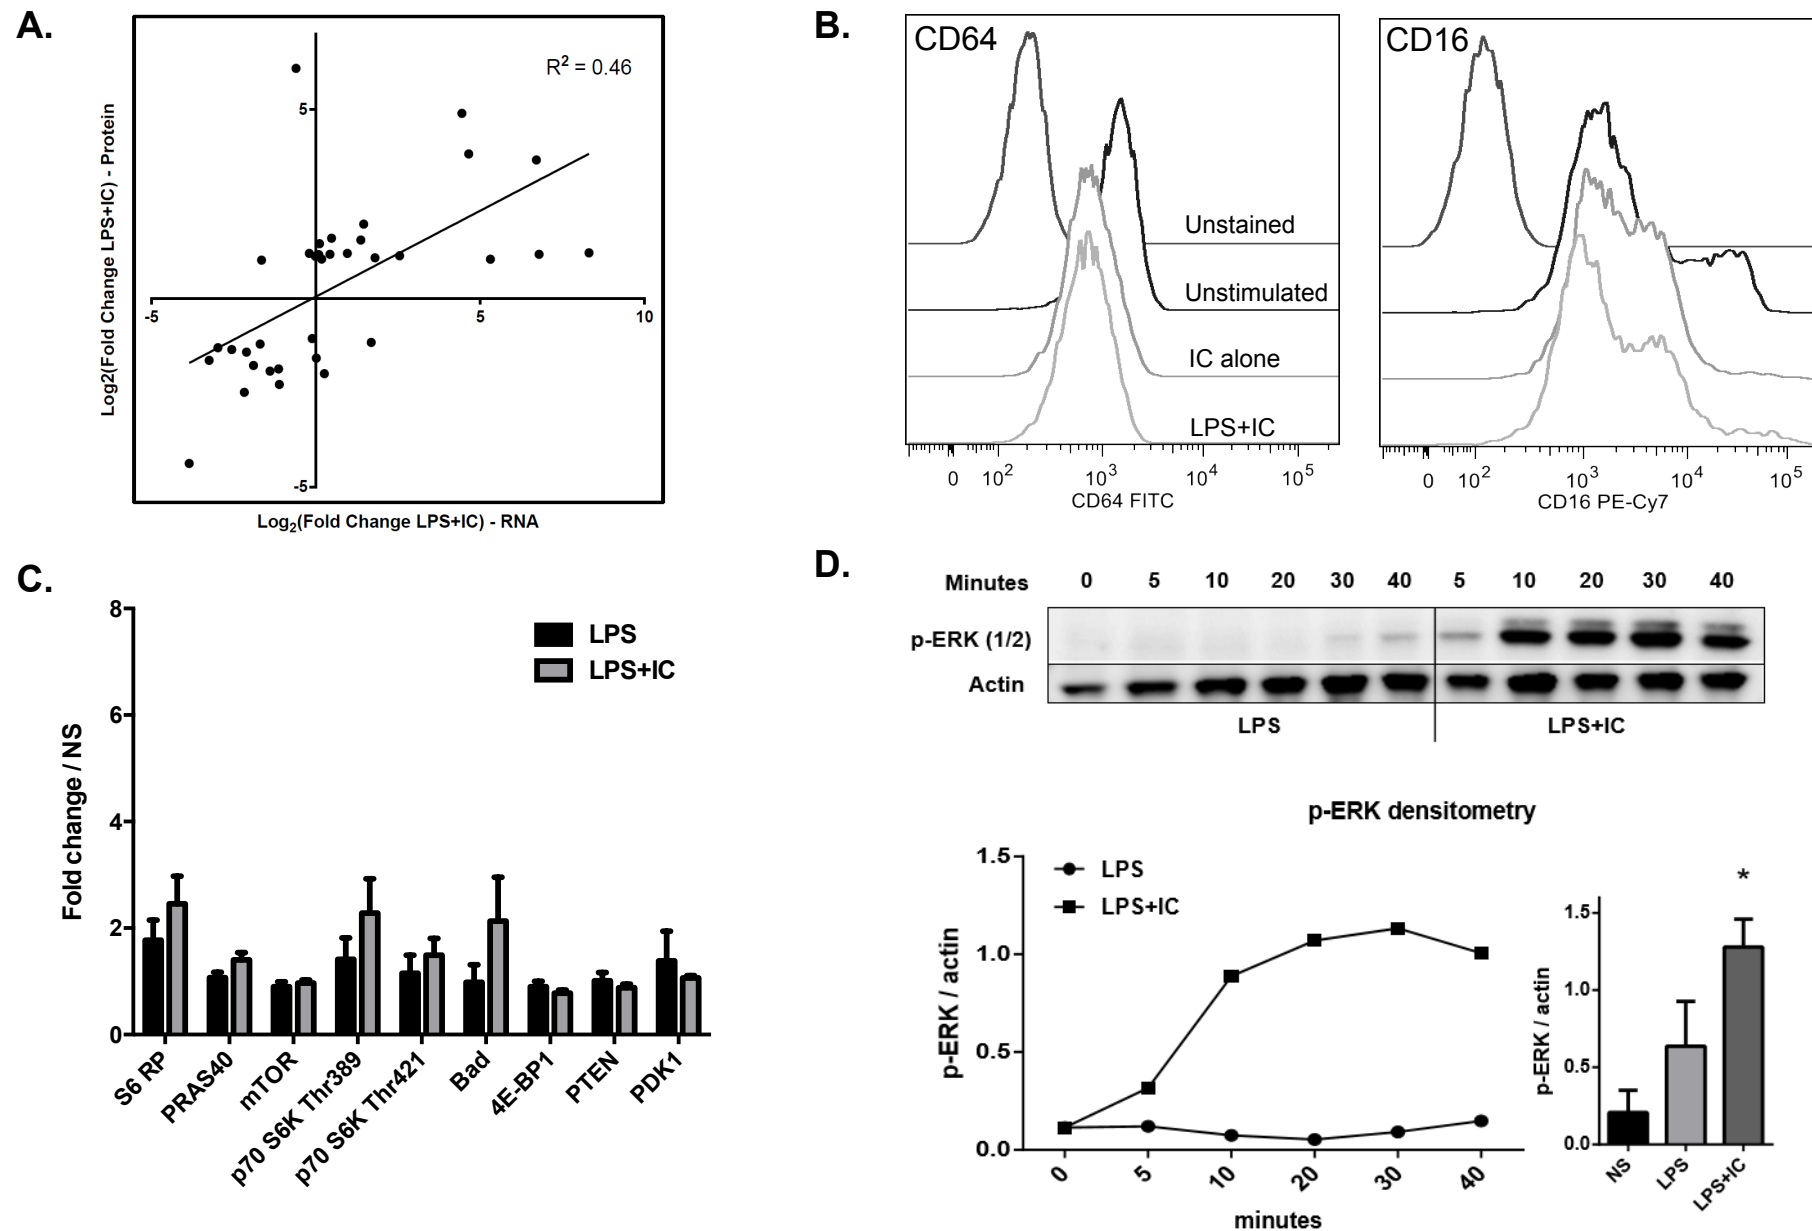

**Supplemental Figure 2. Protein expression and signaling in R-MΦ.** (A) Spearman correlation was performed to compare the log transformed fold changes of the SomaScan markers and their corresponding transcripts from the RNA-seq analysis. (B) Flow cytometry was performed to examine the expression of FC $\gamma$  receptors, CD64 and CD16, following a 4 hour stimulation with IgG-coated latex beads (IC alone) or LPS+IgG-coated latex beads (LPS+IC). (C) Densitometric quantitation of antibody array data showing a variety of kinases not affected by the addition of IC to LPS-stimulated macrophages. (D) Western blot was used to confirm membrane array results of ERK signaling, showing phosphorylation within the first 40 minutes after stimulation with LPS+IC but not LPS. The kinetics of pERK densitometry was calculated using Image J software. Means of pERK from 3 pooled donors at 30 minutes is represented as the ratio over loading control. Error bars represent SEM.

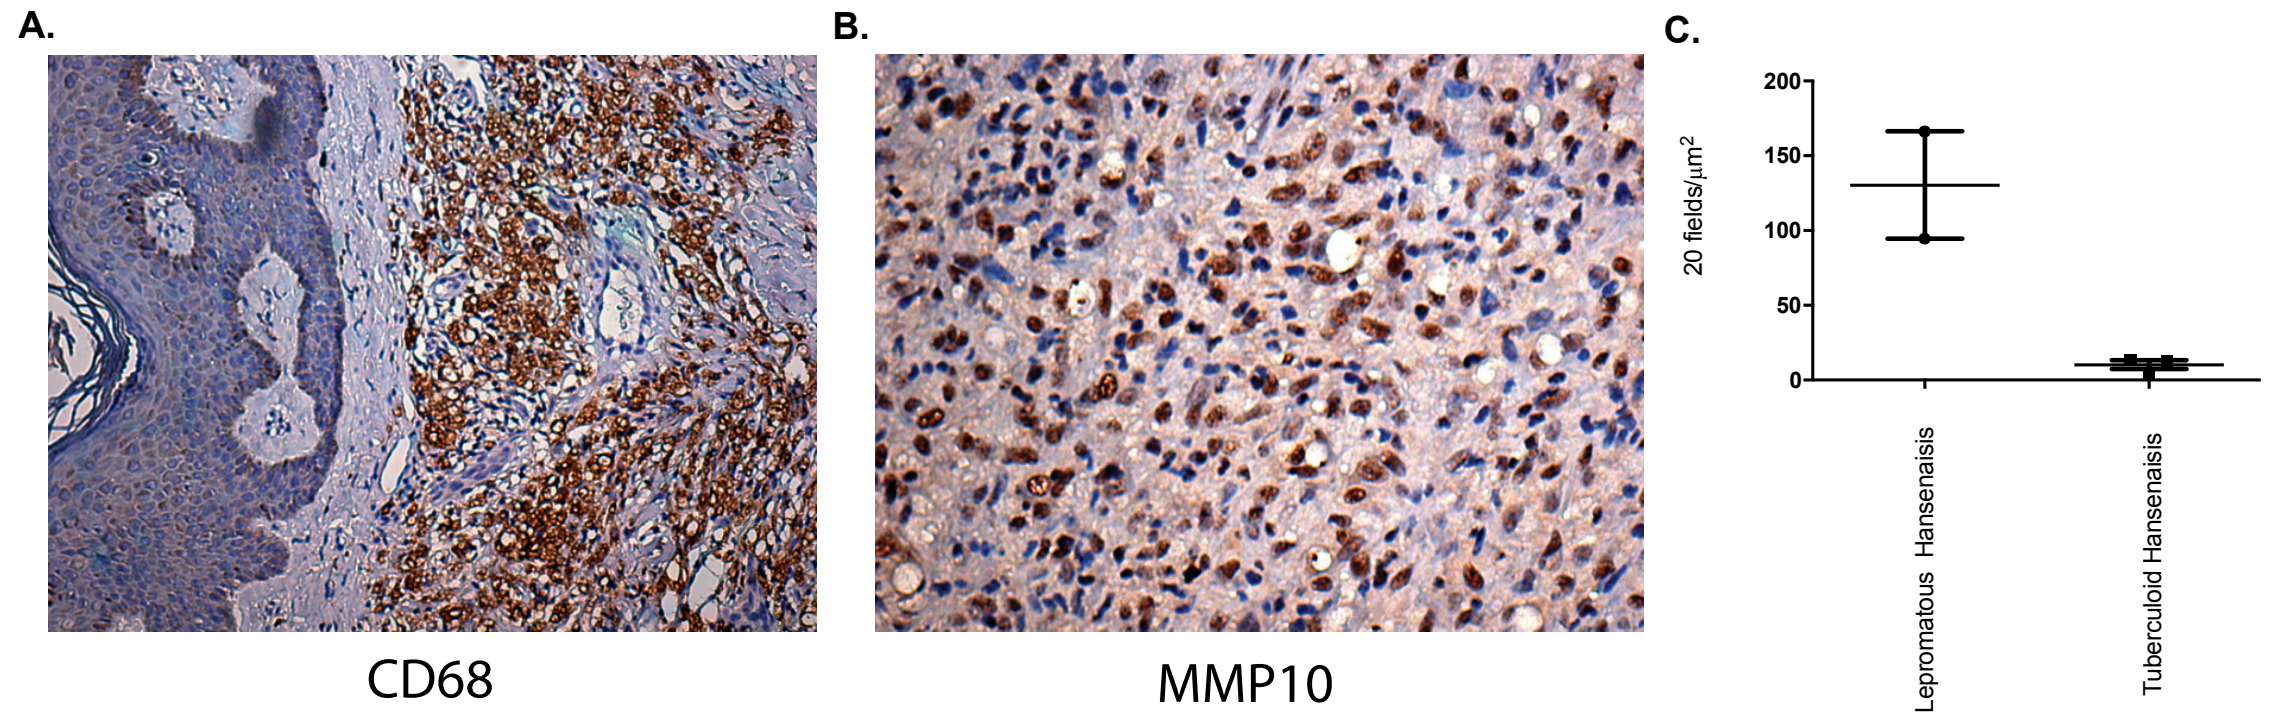

**Supplemental Figure 3. Immunohistochemistry of macrophages in lepromatous leprosy (Hanseniasis).** Biopsies from patients with lepromatous leprosy were stained for (A) CD68 expression, and (B) MMP10 expression. (C) DC-STAMP expression was quantified from immunohistochemistry of lepromatous and tuberculoid Hanseniasis samples. Multiple random fields from (n=2) individuals for lepromatous Hanseniasis and (n=3) individuals for tuberculoid Hanseniasis.
